# Supplementary material for: Antibiotic susceptibility signatures identify potential antimicrobial targets in the Acinetobacter baumannii cell envelope
Source: PubMed Central journal article supplement (PMC7481262; doi:10.1038/s41467-020-18301-2), 2020-09-09
Supplement: 41467_2020_18301_MOESM1_ESM.pdf [file 41467_2020_18301_MOESM1_ESM.pdf]

**Supplementary Information file**

**Antibiotic susceptibility signatures identify potential antimicrobial targets in the  
*Acinetobacter baumannii* cell envelope**

Geisinger et al.

**Supplementary Figures 1-6**

**Supplementary Tables 1-5**

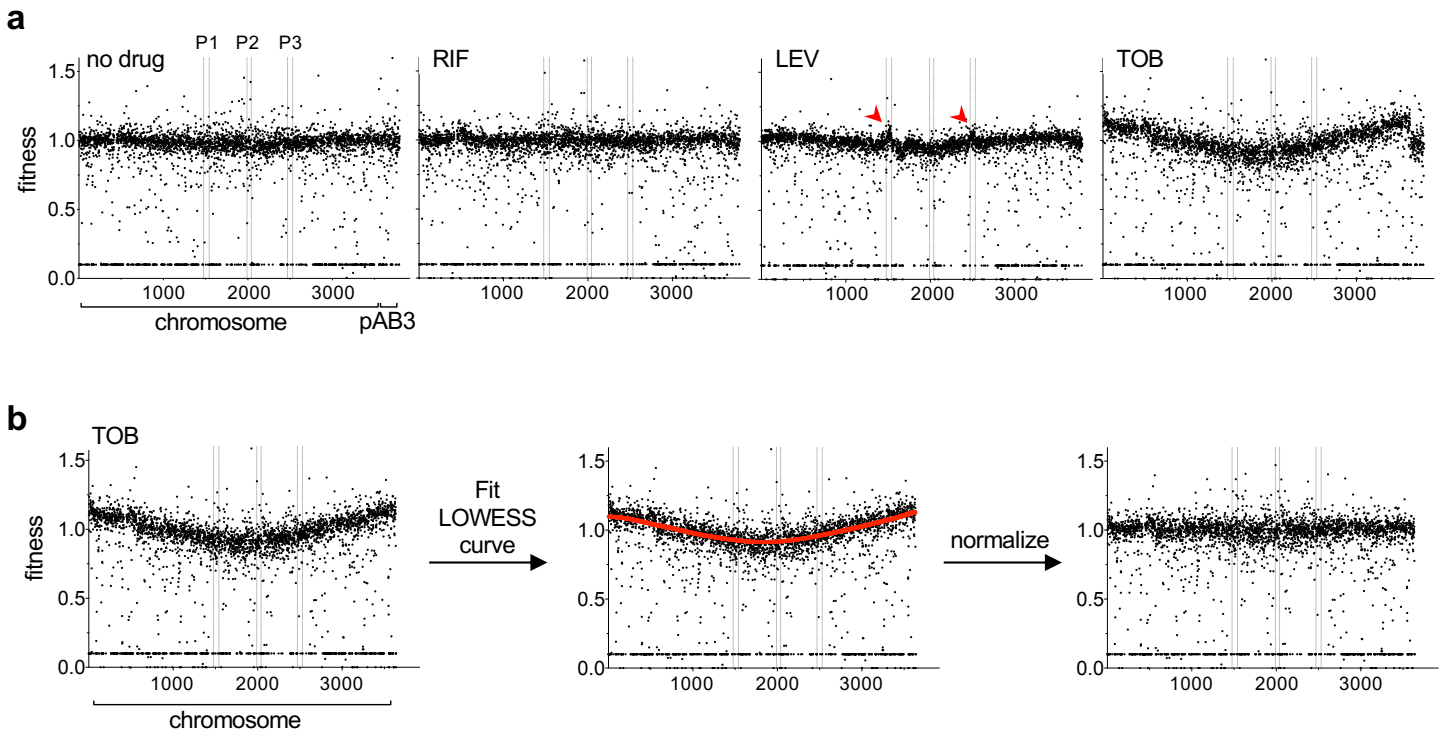

**Supplementary Fig. 1. Correction of chromosome position bias in Tn-seq fitness values associated with TOB treatment.** **a**, Average Tn-seq fitness scores for each gene were plotted according to gene order along the genome (chromosome and pAB3). Representative untreated (no drug) and treated (RIF) data are shown. Absence of large-scale chromosome position bias was confirmed with most treatments. Two exceptions were LEV and TOB. LEV resulted in slight local fitness value increases (red arrowheads) in the region of two prophages (P1 and P3, indicated by dotted lines). TOB caused fitness values to be higher for chromosomal genes closer to the origin of replication, and lower for those close to the replication terminus. **b**, To correct TOB-associated chromosome position bias, fitness values were normalized based on fitting to a LOWESS curve (red). Source data are provided as a Source Data file.

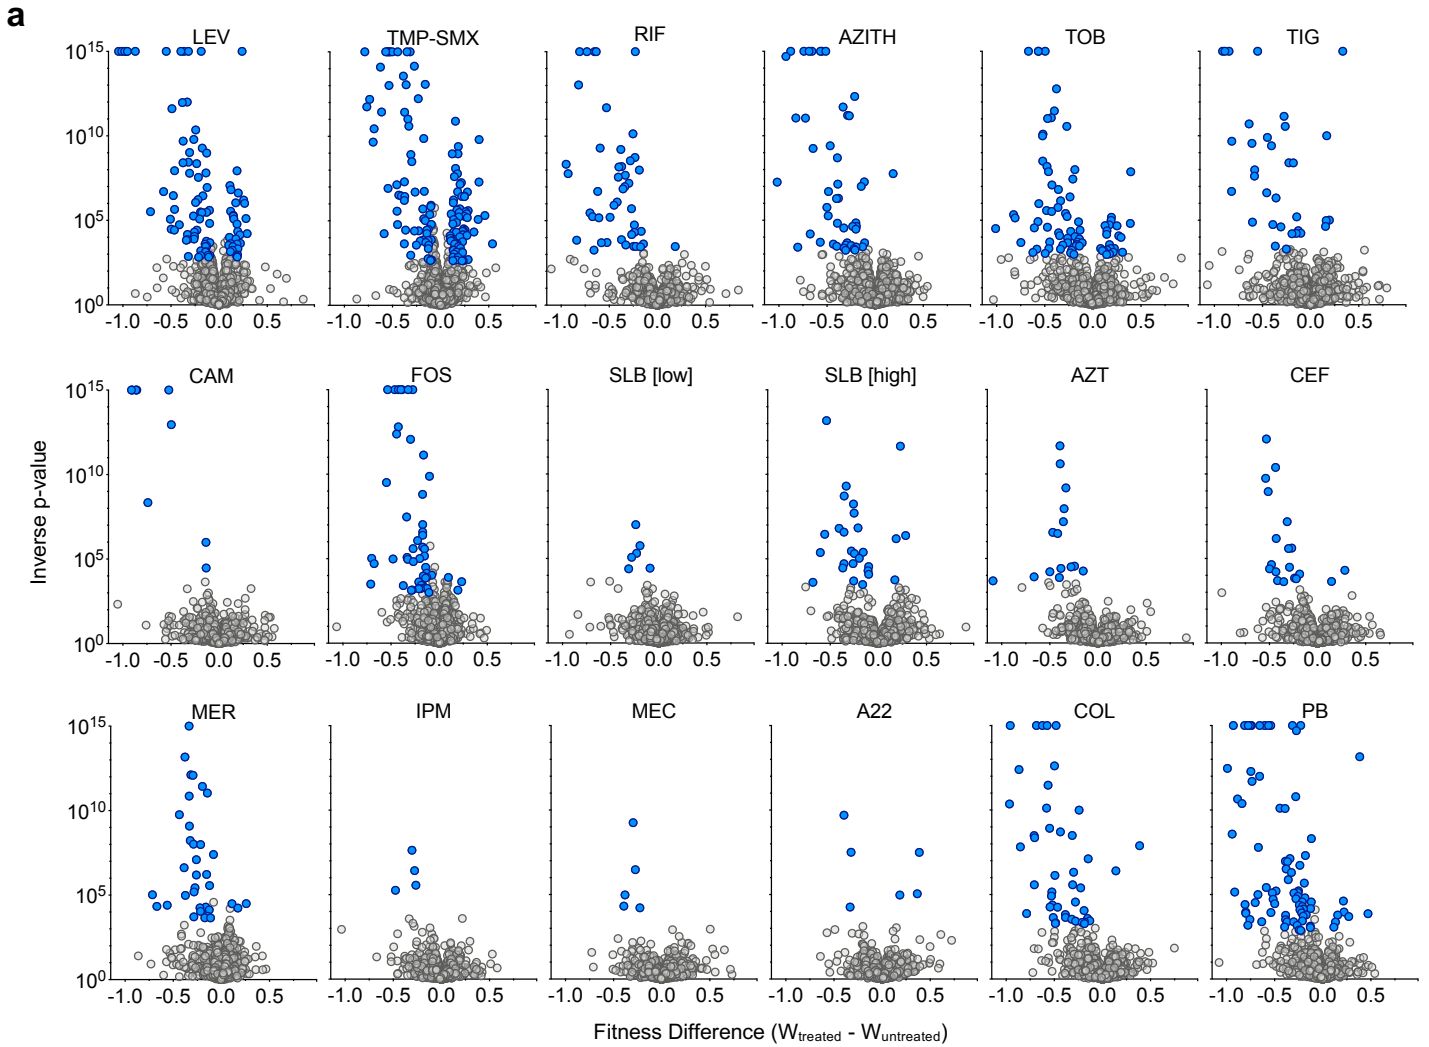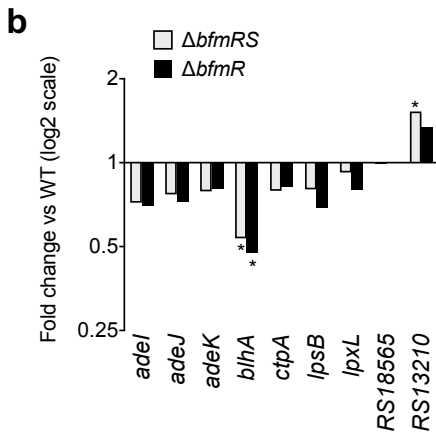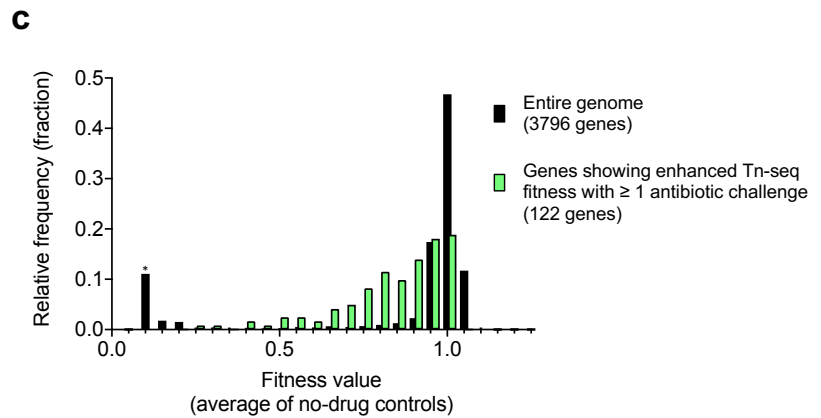

**Supplementary Fig. 2. Intrinsic drug susceptibility determinants in *A. baumannii* identified through Tn-seq.** **a.** Volcano plots show change in gene-level fitness between the indicated sub-MIC antibiotic treatment and untreated control plotted against inverse p value from parallel t tests. tested antibiotic. Blue data points indicate genes that represent candidate drug susceptibility determinants based on passing the three significance criteria (Materials and Methods). Grey data points indicate genes not passing significance criteria. **b.** BfmRS affects transcription of *blhA*. Using our published RNAseq data<sup>1</sup>, candidate broad-susceptibility determining genes were examined for altered transcription levels in strains with *bfmRS* or *bfmR* deletion compared to WT control. Bars show fold change in RNAseq reads (mutant vs WT). \*,  $q < 0.05$ . **c.** Large fraction of genes showing increased Tn-seq fitness with antibiotic challenge have fitness defect in absence of drug. Histogram shows fraction of genes (across entire genome, black; or within subset of 122 genes showing increased Tn-seq fitness with at least one antibiotic challenge, green) with the indicated fitness value in the absence of drug stress. Gene-level fitness values were averaged across all 12 untreated control conditions. Bin marked with \* includes essential and/or small genes in which no transposon insertions were detected (assigned fitness of 0.1). Source data are provided as a Source Data file.

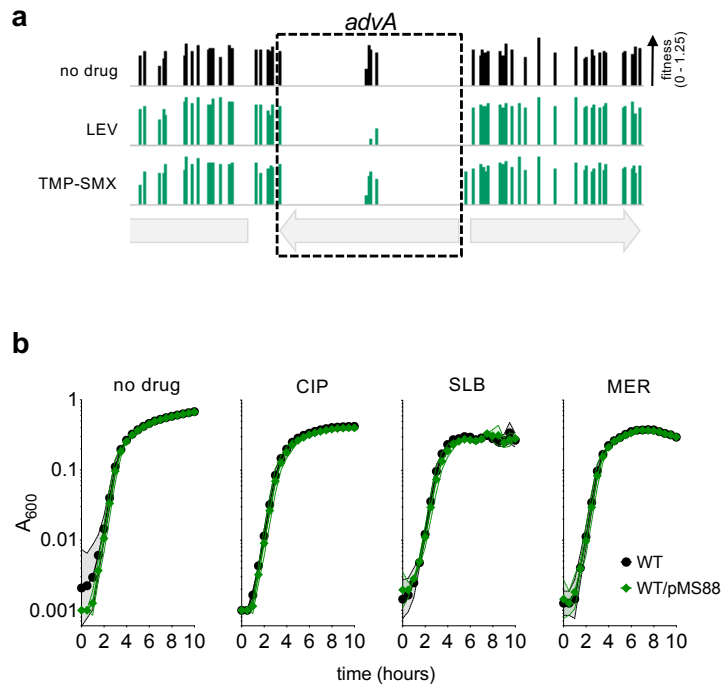

**c**

| # | Template                 | Alignment Coverage | 3D Model | Confidence | % i.d. | Template Information                                                                                                                                                                                                                                              |
|---|--------------------------|--------------------|----------|------------|--------|-------------------------------------------------------------------------------------------------------------------------------------------------------------------------------------------------------------------------------------------------------------------|
| 1 | <a href="#">c5o7jA_</a>  | Alignment          |          | 98.8       | 26     | <b>PDB header:</b> signaling protein<br><b>Chain:</b> A; <b>PDB Molecule:</b> histidine kinase;<br><b>PDBTitle:</b> structural insights into the periplasmic sensor domain of the gacs2 histidine kinase controlling biofilm formation in pseudomonas3 aeruginosa |
| 2 | <a href="#">c4yvwzA_</a> | Alignment          |          | 97.2       | 14     | <b>PDB header:</b> transferase<br><b>Chain:</b> A; <b>PDB Molecule:</b> sensor protein kinase walk;<br><b>PDBTitle:</b> crystal structure of the extracellular receptor domain of the2 essential sensor kinase walk from staphylococcus aureus                    |
| 3 | <a href="#">d3by8a1</a>  | Alignment          |          | 95.4       | 16     | <b>Fold:</b> Profilin-like<br><b>Superfamily:</b> Sensory domain-like<br><b>Family:</b> Sensory domain of two-component sensor kinase                                                                                                                             |
| 4 | <a href="#">d1p0za_</a>  | Alignment          |          | 94.4       | 11     | <b>Fold:</b> Profilin-like<br><b>Superfamily:</b> Sensory domain-like<br><b>Family:</b> Sensory domain of two-component sensor kinase                                                                                                                             |

**Supplementary Fig. 3. Additional information related to *advA* (ACX60\_RS00475) mutant analysis.** **a**, *Mariner* transposon insertions in *advA* yielding mutants with detectable fitness map to the same narrow region of the gene as observed with *Tn10* insertions. Bars show fitness values of individual *mariner* transposon mutants at the indicated locus across all tested banks as in Fig. 3. Transposon insertions in *advA* mapped to codons between residues 203 and 227. **b**, Presence of pMS88 does not affect growth with sub-MIC CIP, SLB, or MER. WT without vector, and WT harboring pMS88 vector were grown to early post-exponential phase at 30°C, back-diluted into media with or without the indicated antibiotic at sub-MIC (Supplementary Table 1), and grown in microtiter format at 37°C. Data points show geometric mean  $\pm$  s.d. (n = 3 independent cultures) as in Fig. 3b. Source data are provided as a Source Data file. **c**, Phyre2 homology modeling prediction of AdvA folding using ACX60\_RS00475 protein sequence. Red horizontal lines in alignment coverage show where along the AdvA polypeptide (white) a structural homolog was found. Hits having >90% confidence that they result from true homology are shown.



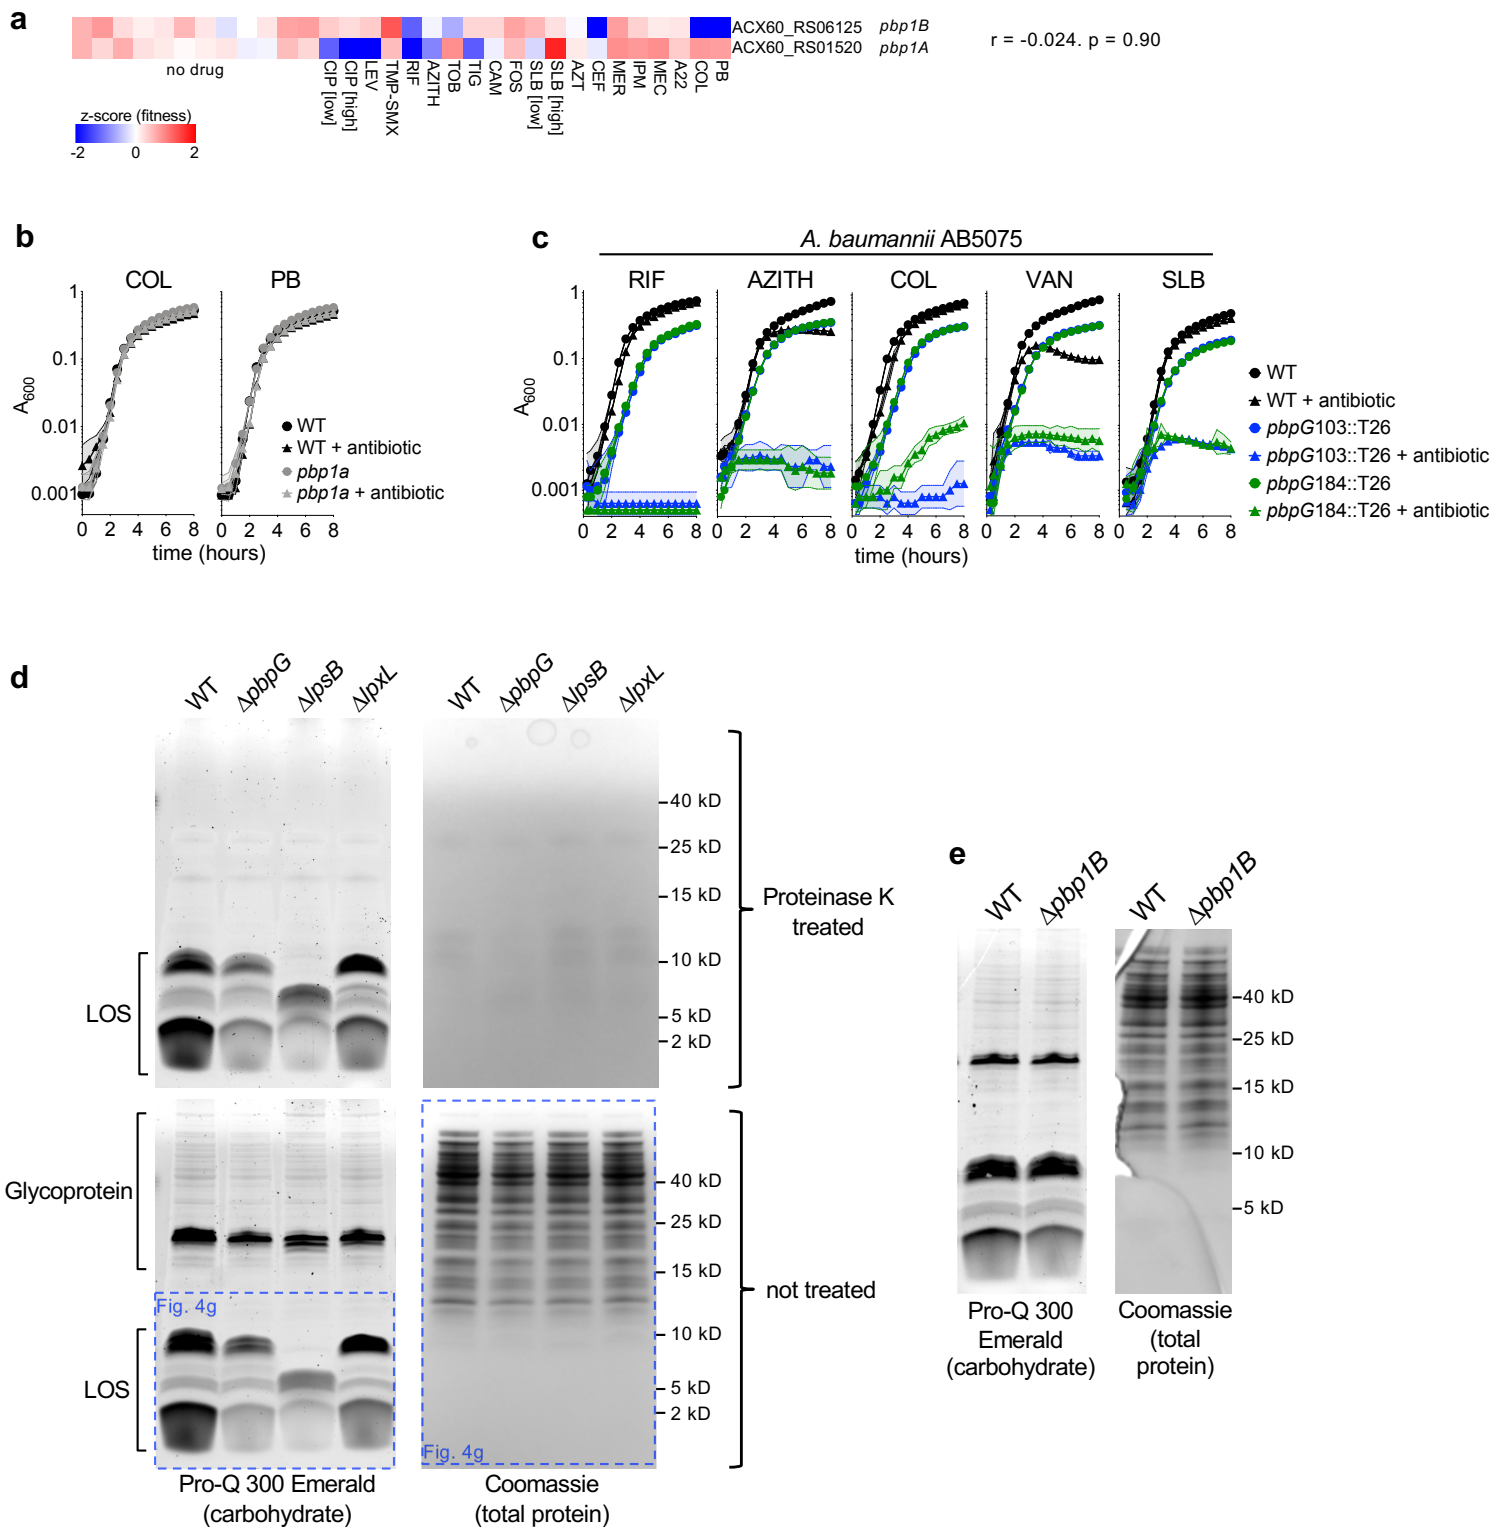

**Supplementary Fig. 4. Additional analysis of relationship of hydrophobic/amphipathic compound sensitivity and LOS biosynthesis.** **a**, *pbp1A* phenotypic signature does not correlate strongly with that of *pbp1B*. Heat map shows z-scored Tn-seq fitness values. Pearson  $r$  correlation and  $p$ -value of *pbp1A* and *pbp1B* phenotypic signatures are indicated. **b**, *pbp1A* mutation does not affect growth with COL or PB, as predicted by its Tn-seq phenotypic signature. EGA627 [*pbp1A*(N178TfsX27)] and WT control were grown in the absence or presence of the indicated antibiotic at 0.3  $\mu$ g/ml and growth monitored in microtiter format. Data points show geometric mean  $\pm$  s.d. ( $n = 3$  independent cultures) as in Fig. 3. **c**, *pbpG* inactivation lowers antibiotic susceptibility in a second *A. baumannii* strain, AB5075. Pure cultures of AB5075 WT, AB09564 (*pbpG103::T26*), and AB09566 (*pbpG184::T26*) were grown in the absence or presence of the indicated antibiotic at concentrations listing in Supplementary Table 1. Data points show geometric mean  $\pm$  s.d. ( $n = 3$  independent cultures) as in Fig. 3. **d**, Proteinase-K treatment does not affect LOS banding pattern, allowing total protein to be used for normalization of LOS signals. Cell lysates were processed in parallel with (top) or without (bottom) proteinase-K treatment before separation via SDS-PAGE and staining for carbohydrate and total protein. Dotted blue rectangles indicate portions of the same gel shown in Fig. 4g. Approximate molecular weights (kDa) are indicated. **e**, WT and  $\Delta$ *pbp1B* (EGA691) were analyzed for LOS content without proteinase-K treatment as described in d. Source data are provided as a Source Data file.

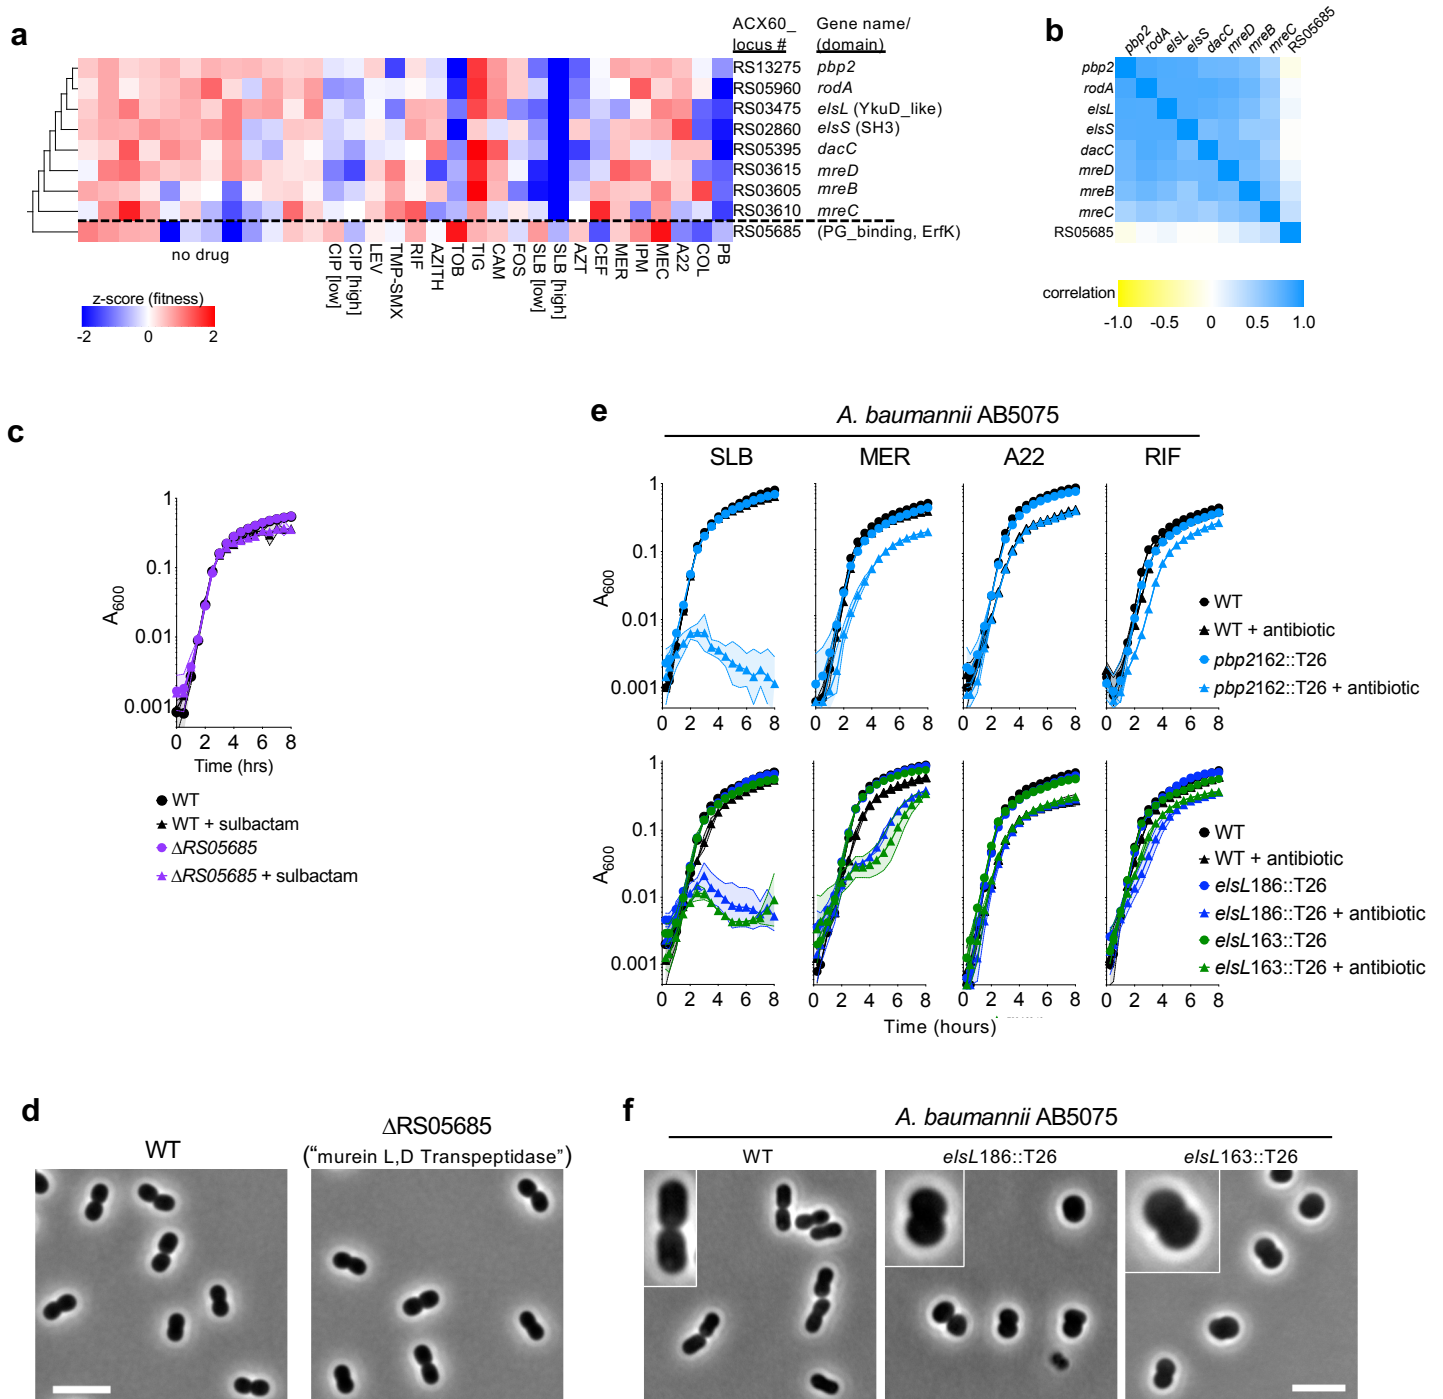

**Supplementary Fig. 5. Additional analysis of relationship of susceptibility to specific block of cell wall synthesis machineries and cell shape.** **a**, Tn-seq phenotypic signatures belonging to Rod system genes plus Fig. 5 discriminating genes identified based on preferential hypersusceptibility to cell wall inhibitors causing filamentation. Heat map shows Tn-seq fitness displayed as z-scored units. Dashed line separates the non-discriminating ACX60\_RS05685 signature from those of other genes. **b**, Correlation matrix of Tn-seq fitness signatures. Heat map shows Pearson  $r$  values. **c,d**,  $\Delta$ RS05685 mutant does not show SLB hypersensitivity or rod shape defect, consistent with the Tn-seq results. RS05685 refers to ACX60\_RS05685. Pure cultures of ATCC 17978 WT and EGA739 ( $\Delta$ RS05685) were grown with or without SLB (0.3  $\mu$ g/ml) as indicated and growth was monitored (c). Data points show geometric mean  $\pm$  s.d. ( $n = 3$  independent cultures) as in Fig. 3. Mid-log phase cells without antibiotics were imaged via phase contrast microscopy (d). Scale bar, 5 $\mu$ m. **e,f**, Mutations in AB5075 strain background display phenotypes consistent with predictions from phenotypic signature analysis in ATCC 17978. AB5075 WT control and mutant strains AB07523, AB01891, and AB01892 (Supplementary Table 4) were cultured as above and data are shown as in panels c and d. Insets in f show 2x magnified views of representative bacteria. Scale bar, 5 $\mu$ m. Source data are provided as a Source Data file.

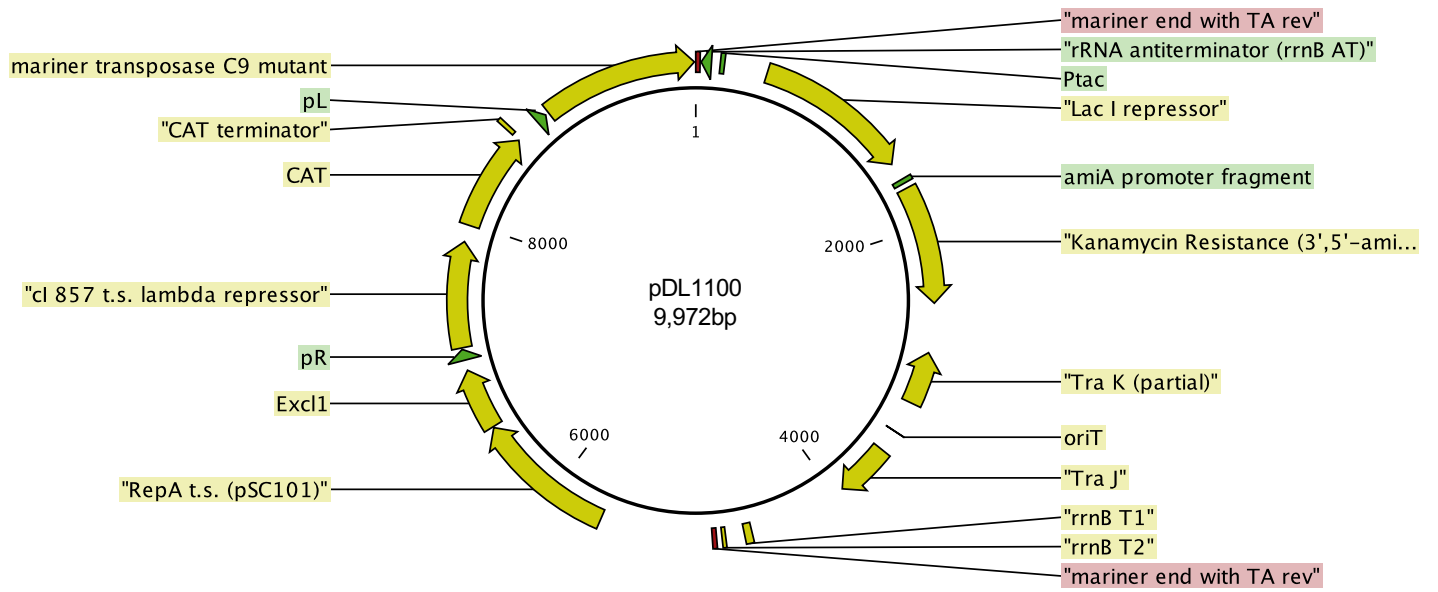

Supplementary Fig. 6. pDL1100 features map.

**Supplementary Table 1. Information on antibiotics and transposon libraries used in these studies.**

|                                                | abbreviation | MW               | xlogP3<br>(PubChem) | MIC in µg/ml<br>(ATCC<br>17978) <sup>a</sup> | Tn-seq (ATCC 17978)              |                                                      |                               | Validation experiments                              |                                                 |
|------------------------------------------------|--------------|------------------|---------------------|----------------------------------------------|----------------------------------|------------------------------------------------------|-------------------------------|-----------------------------------------------------|-------------------------------------------------|
|                                                |              |                  |                     |                                              | drug<br>concentration<br>(µg/ml) | growth rate<br>relative to<br>untreated <sup>b</sup> | transposon<br>library<br>used | drug<br>concentration<br>(µg/ml) with<br>ATCC 17978 | drug<br>concentration<br>(µg/ml) with<br>AB5075 |
| Colistin                                       | COL          | 1155.5           | -3.3                | 1                                            | 0.15-0.2                         | 0.77                                                 | Tn10                          | 0.3                                                 | 0.3                                             |
| Polymyxin B                                    | PB           | 1203.5           | -2.5                | 0.5                                          | 0.15-0.25                        | 0.74                                                 | Tn10                          | 0.3                                                 | ND                                              |
| Rifampicin                                     | RIF          | 822.9            | 4.9                 | 4                                            | 0.65-0.85                        | 0.79                                                 | Tn10                          | 0.85                                                | 0.4                                             |
| Azithromycin                                   | AZITH        | 749.0            | 4                   | 2                                            | 0.75-1                           | 0.75                                                 | Tn10                          | 0.2                                                 | 2                                               |
| Mecillinam                                     | MEC          | 325.4            | 2.1                 | 64                                           | 10-12                            | 0.76                                                 | Tn10                          | 16                                                  | ND                                              |
| Aztreonam                                      | AZT          | 435.4            | 0.3                 | 16                                           | 6-8                              | 0.76                                                 | Tn10                          | 5                                                   | 80                                              |
| Sulbactam [high]                               | SLB          | 233.2            | -1                  | 1                                            | 0.25-0.3                         | 0.72                                                 | Tn10                          | 0.3                                                 | 16                                              |
| Sulbactam [low]                                | SLB          | 233.2            | -1                  | 1                                            | 0.15                             | 0.86                                                 | Tn10                          |                                                     |                                                 |
| Ceftazidime                                    | CEF          | 546.6            | 0.4                 | 4                                            | 2                                | 0.76                                                 | Tn10                          | ND                                                  | 64                                              |
| Imipenem                                       | IPM          | 299.3            | -0.7                | 0.4                                          | 0.025                            | 0.71                                                 | Tn10                          | 0.035                                               | ND                                              |
| Meropenem                                      | MER          | 383.5            | -2.4                | 0.2                                          | 0.045-0.05                       | 0.7                                                  | Tn10                          | 0.05                                                | 4                                               |
| A22                                            | A22          | 271.6            | ND                  | 64                                           | 14-16                            | 0.75                                                 | Tn10                          | 16                                                  | 10                                              |
| Fosfomycin                                     | FOS          | 138.1            | -1.4                | 125                                          | 75-90                            | 0.75                                                 | Tn10                          | ND                                                  | ND                                              |
| Trimethoprim-<br>Sulfamethoxazole <sup>c</sup> | TMP-SMX      | 290.3 /<br>253.3 | 0.9 /<br>0.9        | 16                                           | 8-9.5                            | 0.74                                                 | <i>mariner</i>                | ND                                                  | ND                                              |
| Tobramycin                                     | TOB          | 467.5            | -6.2                | 2                                            | 0.75-1                           | 0.78                                                 | Tn10                          | ND                                                  | ND                                              |
| Tigecycline                                    | TIG          | 585.7            | 1.1                 | 0.5                                          | 0.15-0.25                        | 0.73                                                 | Tn10                          | ND                                                  | ND                                              |
| Chloramphenicol                                | CAM          | 323.1            | 1.1                 | 128                                          | 8.5-9                            | 0.74                                                 | Tn10                          | ND                                                  | ND                                              |
| Ciprofloxacin [high] <sup>d</sup>              | CIP          | 331.3            | -1.1                | 0.5                                          | 0.09-1                           | 0.74                                                 | Tn10                          | ND                                                  | ND                                              |
| Ciprofloxacin [low] <sup>d</sup>               | CIP          | 331.3            | -1.1                | 0.5                                          | 0.075                            | 0.84                                                 | Tn10                          |                                                     |                                                 |
| Levofloxacin                                   | LEV          | 361.4            | -0.4                | 0.25                                         | 0.05-0.06                        | 0.74                                                 | <i>mariner</i>                | ND                                                  | ND                                              |
| Vancomycin                                     | VAN          | 1449.2           | -3.1                | 500                                          | ND                               | ND                                                   | ND                            | ND                                                  | 100                                             |

<sup>a</sup>MIC determined in LB by CFE assay (1) except for AZITH, LEV, MER, TIG, and TMP/SMX (broth dilution)<sup>b</sup>average of 10 independent cultures<sup>c</sup>TMP-SMX denotes combination of Trimethoprim (TMP) and Sulfamethoxazole (SMX) in 1:5 ratio<sup>d</sup>Tn-seq data with ciprofloxacin were described in (2)

ND, not determined

**Supplementary Table 2. List of top-ranked antibiotic susceptibility determinants in which Tn mutation causes significantly decreased (blue) or increased (yellow) fitness with 10 or more antibiotic challenge conditions.**

Significant Tn-seq fitness change (drug treated vs untreated )

| locus         | Gene name                | Protein ID     | Protein annotation                                    | CIP [low] | CIP [high] | LEV | TMP-SMX | RIF | AZITH | TOB | TIG | CAM | FOS | SLB [low] | SLB [high] | AZT | CEF | MER | IPM | MEC | AZ2 | COL | PB |
|---------------|--------------------------|----------------|-------------------------------------------------------|-----------|------------|-----|---------|-----|-------|-----|-----|-----|-----|-----------|------------|-----|-----|-----|-----|-----|-----|-----|----|
| ACX60_RS03835 | <i>adel</i>              | WP_000986589.1 | Efflux system membrane fusion protein                 | ■         | ■          | ■   | ■       | ■   | ■     | ■   | ■   | ■   | ■   | ■         | ■          | ■   | ■   | ■   | ■   | ■   | ■   | ■   | ■  |
| ACX60_RS03830 | <i>adeJ</i>              | WP_000046679.1 | Efflux pump membrane transporter                      | ■         | ■          | ■   | ■       | ■   | ■     | ■   | ■   | ■   | ■   | ■         | ■          | ■   | ■   | ■   | ■   | ■   | ■   | ■   | ■  |
| ACX60_RS03825 | <i>adeK</i>              | WP_001174793.1 | Efflux transporter, outer membrane factor lipoprotein | ■         | ■          | ■   | ■       | ■   | ■     | ■   | ■   | ■   | ■   | ■         | ■          | ■   | ■   | ■   | ■   | ■   | ■   | ■   | ■  |
| ACX60_RS14635 | <i>bfmR</i>              | WP_000076440.1 | Two-component system response regulator protein       | ■         | ■          | ■   | ■       | ■   | ■     | ■   | ■   | ■   | ■   | ■         | ■          | ■   | ■   | ■   | ■   | ■   | ■   | ■   | ■  |
| ACX60_RS16945 | <i>blhA</i>              | WP_001207335.1 | Uncharacterized protein                               | ■         | ■          | ■   | ■       | ■   | ■     | ■   | ■   | ■   | ■   | ■         | ■          | ■   | ■   | ■   | ■   | ■   | ■   | ■   | ■  |
| ACX60_RS16915 | <i>ctpA</i>              | WP_000939111.1 | C-terminal processing peptidase family protein        | ■         | ■          | ■   | ■       | ■   | ■     | ■   | ■   | ■   | ■   | ■         | ■          | ■   | ■   | ■   | ■   | ■   | ■   | ■   | ■  |
| ACX60_RS15945 | <i>lpxL<sub>Ab</sub></i> | WP_000078875.1 | Lipid A biosynthesis lauroyltransferase               | ■         | ■          | ■   | ■       | ■   | ■     | ■   | ■   | ■   | ■   | ■         | ■          | ■   | ■   | ■   | ■   | ■   | ■   | ■   | ■  |
| ACX60_RS15950 | <i>lpsB</i>              | WP_000867093.1 | LOS glycosyl transferase                              | ■         | ■          | ■   | ■       | ■   | ■     | ■   | ■   | ■   | ■   | ■         | ■          | ■   | ■   | ■   | ■   | ■   | ■   | ■   | ■  |
| ACX60_RS13210 |                          | WP_001004359.1 | 5-formyltetrahydrofolate cyclo-ligase                 | ■         | ■          | ■   | ■       | ■   | ■     | ■   | ■   | ■   | ■   | ■         | ■          | ■   | ■   | ■   | ■   | ■   | ■   | ■   | ■  |
| ACX60_RS18565 |                          | WP_001101323.1 | Uncharacterized protein (pAB3)                        | ■         | ■          | ■   | ■       | ■   | ■     | ■   | ■   | ■   | ■   | ■         | ■          | ■   | ■   | ■   | ■   | ■   | ■   | ■   | ■  |

blue = mutation of gene caused decreased fitness in presence of drug  
yellow = mutation of gene caused increased fitness in presence of drug

**Supplementary Table 3. Drug-drug interaction results.**

| drug combination | diagonal method (duplicate determinations) |             |                                   | checkerboard (single determination) |
|------------------|--------------------------------------------|-------------|-----------------------------------|-------------------------------------|
|                  | average log <sub>2</sub> FIC score         | s.d.        | p value (two tailed) <sup>a</sup> | alpha score                         |
| A22+AZT          | -0.39                                      | 0.58        | 0.516                             |                                     |
| A22+CEF          | -0.44                                      | 0.30        | 0.292                             |                                     |
| A22+COL          | 0.06                                       | 0.30        | 0.813                             |                                     |
| A22+IPM          | 0.11                                       | 0.10        | 0.361                             |                                     |
| A22+MEC          | 0.27                                       | 0.13        | 0.205                             | 4.39                                |
| A22+SLB          | -0.49                                      | 0.13        | 0.116                             |                                     |
| <b>AZT+CEF</b>   | <b>-0.85</b>                               | <b>0.06</b> | <b>0.034</b>                      | -0.19                               |
| AZT+COL          | -0.96                                      | 0.40        | 0.181                             |                                     |
| AZT+IPM          | -0.20                                      | 0.03        | 0.064                             |                                     |
| <b>AZT+MEC</b>   | <b>-1.61</b>                               | <b>0.10</b> | <b>0.028</b>                      | -2.14                               |
| <b>AZT+SLB</b>   | <b>-0.66</b>                               | <b>0.04</b> | <b>0.029</b>                      | -0.29                               |
| CEF+COL          | 0.32                                       | 0.10        | 0.137                             |                                     |
| CEF+IPM          | -0.39                                      | 0.33        | 0.339                             |                                     |
| CEF+MEC          | -0.69                                      | 0.35        | 0.216                             | -1.22                               |
| CEF+SLB          | -0.06                                      | 0.08        | 0.500                             | 0.06                                |
| COL+IPM          | 0.03                                       | 0.25        | 0.874                             |                                     |
| COL+MEC          | 0.12                                       | 0.13        | 0.410                             |                                     |
| COL+SLB          | 0.08                                       | 0.21        | 0.688                             |                                     |
| IPM+MEC          | 0.06                                       | 0.09        | 0.500                             | -0.33                               |
| <b>IPM+SLB</b>   | <b>-0.49</b>                               | <b>0.05</b> | <b>0.046</b>                      |                                     |
| <b>MEC+SLB</b>   | <b>-0.99</b>                               | <b>0.07</b> | <b>0.032</b>                      | -2.33                               |

<sup>a</sup>Mean log<sub>2</sub>FIC score of each interaction was compared to a hypothetical mean of 0 via one-sample t-test. Scores significantly different from the reference value ( $p < 0.05$ ) are highlighted in bold.

Supplementary Table 4. Strains and plasmids.

| Strain or plasmid          | Genotype or description                                                                                                        | Reference  |
|----------------------------|--------------------------------------------------------------------------------------------------------------------------------|------------|
| <b><i>A. baumannii</i></b> |                                                                                                                                |            |
| ATCC 17978                 | cerebrospinal fluid isolate                                                                                                    | 3          |
| EGA746                     | ATCC 17978 $\Delta blhA$                                                                                                       | This study |
| EGA745                     | ATCC 17978 $\Delta advA$ with pEGE292 (pMS88:: <i>advA</i> )                                                                   | This study |
| AFA11                      | ATCC 17978 $\Delta advA$ with pEGE309 ( <i>T5lacP-advA-gfp</i> )                                                               | This study |
| EGA749                     | ATCC 17978 $\Delta pbpG$                                                                                                       | This study |
| YDA341                     | ATCC 17978 $\Delta pbpG$ with pYDE210                                                                                          | This study |
| YDA265                     | ATCC 17978 $\Delta lpsB$                                                                                                       | This study |
| YDA269                     | ATCC 17978 $\Delta lpxL_{Ab}$                                                                                                  | This study |
| EGA691                     | ATCC 17978 $\Delta pbp1B$                                                                                                      | This study |
| EGA627                     | ATCC 17978 <i>pbp1A</i> (N178TfsX27)                                                                                           | 2          |
| EGA692                     | ATCC 17978 $\Delta pbp2$                                                                                                       | 1          |
| YDA208                     | ATCC 17978 $\Delta pbp2$ with pYDE135                                                                                          | 1          |
| EGA738                     | ATCC 17978 $\Delta elsL$ (ACX60_RS03475)                                                                                       | This study |
| EGA780                     | ATCC 17978 $\Delta elsL$ (ACX60_RS03475) with pEGE308                                                                          | This study |
| EGA739                     | ATCC 17978 $\Delta ACX60\_RS05685$                                                                                             | This study |
| YDA229                     | ATCC 17978 $\Delta elsS$ (ACX60_RS02860)                                                                                       | This study |
| AB5075-UW                  | bone isolate/osteomyelitis                                                                                                     | 4          |
| AB09564                    | AB5075-UW <i>pbpG</i> 103::T26 (Tn insertion at ABUW_3638 ORF position 737bp)                                                  | 4          |
| AB09566                    | AB5075-UW <i>pbpG</i> 184::T26 (Tn insertion at ABUW_3638 ORF position 140bp)                                                  | 4          |
| AB07523                    | AB5075-UW <i>pbp</i> 2162::T26 (Tn insertion at ABUW_2876 ORF position 443bp)                                                  | 4          |
| AB01891                    | AB5075-UW <i>elsL</i> 186::T26 (Tn insertion at ABUW_0690 ORF position 239bp)                                                  | 4          |
| AB01892                    | AB5075-UW <i>elsL</i> 163::T26 (Tn insertion at ABUW_0690 ORF position 333bp)                                                  | 4          |
| <b><i>E. coli</i></b>      |                                                                                                                                |            |
| DH5 $\alpha$               | <i>supE44</i> $\Delta lacU169$ ( $\phi 80lacZ\Delta M15$ ) <i>hsdR17 recA1 endA1 gyrA96 thi-1 relA1</i>                        | 5          |
| DH5 $\lambda$ pir          | DH5 $\alpha$ ( $\lambda$ pir) <i>tet::Mu recA</i>                                                                              | 6          |
| TO60                       | DH5 $\alpha$ $\lambda$ pir [F' <i>proAB lac<sup>q</sup>Z</i> $\Delta$ M15 Tn10 (Tc <sup>R</sup> )]                             | 7          |
| XL1-blue                   | <i>recA1 endA1 gyrA96 thi-1 hsdR17 supE44 relA1 lac</i> [F' <i>proAB lac<sup>q</sup>Z</i> $\Delta$ M15 Tn10 Tc <sup>R</sup> )] | Stratagene |
| BTH101                     | F <sup>-</sup> , <i>cya-99, araD139, galE15, galK16, rpsL1</i> (Sm <sup>R</sup> ), <i>hsdR2, mcrA1, mcrB1</i>                  | 8          |
| <b>plasmids</b>            |                                                                                                                                |            |
| pUC18                      | <i>oriColE1</i> MCS Cb <sup>R</sup>                                                                                            | 9          |
| pSR47S                     | <i>oriTRP4 oriR6K sacB</i> Km <sup>R</sup>                                                                                     | 10         |
| pJB4648                    | Gm <sup>R</sup> derivative of pSR47S                                                                                           | 10         |
| pMS88                      | Ts (stability) derivative of broad-host range plasmid R1162 (IncQ Su <sup>R</sup> Sm <sup>R</sup> Km <sup>R</sup> )            | 11         |
| pEGE292                    | pMS88 with <i>advA</i> replacing NheI-PstI fragment (Sm <sup>R</sup> Km <sup>R</sup> )                                         | This study |
| pWH1266                    | <i>ori pBR322 ori pWH1277</i> MCS Tc <sup>r</sup> Cb <sup>f</sup>                                                              | 12         |

|         |                                                                                                                                                                                       |            |
|---------|---------------------------------------------------------------------------------------------------------------------------------------------------------------------------------------|------------|
| pEGE305 | Derivative of pWH1266 <i>E. coli</i> - <i>A. baumannii</i> shuttle vector with <i>lacI<sup>f</sup></i> , T5- <i>lacP</i> , Tc <sup>R</sup>                                            | 1          |
| pEGE309 | pEGE305 with <i>advA-gfp</i> downstream of T5- <i>lacP</i> promoter                                                                                                                   | This study |
| pEGE308 | pEGE305 with <i>elsL</i> downstream of T5- <i>lacP</i> promoter                                                                                                                       | This study |
| pYDE135 | pEGE305 with <i>pbp2</i> downstream of T5- <i>lacP</i> promoter                                                                                                                       | This study |
| pYDE153 | pEGE305 with <i>SacI</i> - <i>XbaI</i> fragment removed and filled, and <i>PstI</i> - <i>EcoRI</i> fragment replaced with a linker containing multiple cloning sites, Tc <sup>R</sup> | This study |
| pYDE210 | pYDE153 with <i>pbpG</i> downstream of T5- <i>lacP</i> promoter                                                                                                                       | This study |
| pDL1073 | Tn10 (Km <sup>R</sup> ) delivery plasmid, <i>ori pSC101</i> Cb <sup>R</sup>                                                                                                           | 2          |
| pDL1100 | Mariner (Km <sup>R</sup> ) delivery plasmid, <i>ori pSC101</i> Cm <sup>R</sup>                                                                                                        | This study |
| pKT25   | Bacterial two-hybrid plasmid for fusion of protein N-terminus with CyaA T25 fragment, <i>ori p15</i> , Km <sup>R</sup>                                                                | 8          |
| pKNT25  | Bacterial two-hybrid plasmid for fusion of protein C-terminus with CyaA T25 fragment, <i>ori p15</i> , Km <sup>R</sup>                                                                | 8          |
| pUT18   | Bacterial two-hybrid plasmid for fusion of protein C-terminus with CyaA T18 fragment, <i>ori ColE1</i> , Cb <sup>R</sup>                                                              | 8          |
| pUT18C  | Bacterial two-hybrid plasmid for fusion of protein N-terminus with CyaA T18 fragment, <i>ori ColE1</i> , Cb <sup>R</sup>                                                              | 8          |



**Supplementary Table 5. Oligonucleotide primers**

| <b>Cloning</b>                  |                                                          |                   |
|---------------------------------|----------------------------------------------------------|-------------------|
| <b>primer name</b>              | <b>Sequence (5' – 3'; restriction site underlined)</b>   | <b>RE site(s)</b> |
| gene deletion                   |                                                          |                   |
| DadvA-upF                       | CAAGT <u>GGATCC</u> ATCGCAAGCATCGGTAATC                  | BamHI             |
| DadvA-upR                       | GGCTAGCGG <u>TACCC</u> CTTGTCTAGGCGCAATC                 | KpnI              |
| DadvA-dwnF                      | CCTCAAGG <u>TACCA</u> GCCGAGTAGTGCAGCATC                 | KpnI              |
| DadvA-dwnR                      | CTTTATG <u>TGCGA</u> CTAAGCAAATCGCGAACAGGAC              | SalI              |
| DpbpGup-F                       | ACGGT <u>AGGATCC</u> ATACCAAGTGCCCAAACG                  | BamHI             |
| DpbpGup-R                       | AAAGCT <u>GGTACCA</u> CTCAAATAAGCAAATAGACATGC            | KpnI              |
| DpbpGdwn-F                      | ACTAACGGT <u>ACCGG</u> TGGTTAAGTAATTTGCCAAAACG           | KpnI              |
| DpbpGdwn-R                      | GATGGGG <u>TGCGA</u> CGCGCAAGCCATGATGTATG                | SalI              |
| D-lpsB-upF                      | TTCGT <u>GGATCC</u> GAAGTTTGTTCCTGAATGGTC                | BamHI             |
| D-lpsB-upR                      | GGGAGGGT <u>ACCC</u> ATCACTTTTCATTGTTTTGGC               | KpnI              |
| D-lpsB-dwnF                     | CCCTT <u>GGTAC</u> CTATCAAAGTGTATTGAATTGAAATAACCC        | KpnI              |
| D-lpsB-dwnR                     | ACAAAGCGG <u>CGC</u> CTCTCAATATAAGCATACAAGTGAAGAAG       | NotI              |
| D-lpxL-upF                      | TTGAAGGGAT <u>CC</u> CTCCTTGAAAAGTTAGAGCGTTG             | BamHI             |
| D-lpxL-upR                      | GCGT <u>GGTAC</u> CTGCTTTTGGCTCATAACGATATAAAG            | KpnI              |
| D-lpxL-dwnF                     | CTGAGGGT <u>ACCGA</u> GAGATTTATTAAGATAAGGCTG             | KpnI              |
| D-lpxL-dwnR                     | CTTTGCGCGG <u>CCG</u> CGTGTTTTGCAACTCACTTAAATAG          | NotI              |
| D-elsL-dwnF                     | AGCAGT <u>GGTAC</u> CGCCGACAATTTCTGAGCGAG                | KpnI              |
| D-elsL-dwnR                     | GCTCTAGT <u>CGACG</u> AGCTAAGCGCCCTTAACATCTTCATCG        | SalI              |
| D-elsL-upF                      | TACTCT <u>GGATCC</u> GAGACATAAATTGAAGTAAGGGTTCTG         | BamHI             |
| D-elsL-upR                      | TAAATT <u>GGTAC</u> CTCGAATTTCTTCTTATATCAACTCAAC         | KpnI              |
| DldtAb2-dwnF                    | TTAGTG <u>GGTAC</u> CGTACGTTTCAGGCGTAACTGTTAAATTC        | KpnI              |
| DldtAb2-dwnR                    | ACAGTAGT <u>CGACG</u> CTTTAGATGCTTTTGAGAAAAAGAAGG        | SalI              |
| DldtAb2-upF                     | TTCACGGGAT <u>CC</u> TAAAGCCCCACCCCAACTATC               | BamHI             |
| DldtAb2-upR                     | CATAGCGG <u>TAC</u> CTGAGCGAACAAACATGTAATTCAAC           | KpnI              |
| D-elsS-upR                      | AGAAAAGG <u>TACCG</u> GTGCAAGCTGCATGCGTTTAC              | KpnI              |
| D-elsS-upF                      | TAAGACGCGG <u>CCG</u> CAGCCGATACACAGCATCCTTTAC           | NotI              |
| D-elsS-dwnR                     | TGCTT <u>GGATCC</u> GCAATCCAGCGCCAATTACG                 | BamHI             |
| D-elsS-dwnF                     | CCAAAAGG <u>TACCG</u> TCAGTGGTAATCCTGAGCGAC              | NotI              |
| D-dacC-upF                      | TTCGT <u>GGATCC</u> TGCCATGTACCTAAGTGGTTATTC             | BamHI             |
| D-dacC-upR                      | GGGAGGGT <u>AC</u> CTCGAGTCATTCTAGGTAATTCCAATATC         | KpnI              |
| D-dacC-dwnF                     | CTGAGGGT <u>AC</u> CTTCAGCAACTTATTCTAAATTTAA             | KpnI              |
| D-dacC-dwnR                     | CTTTGCGCGG <u>CCG</u> CGTCTCTGTTAGTGTTCCTACTACAT         | NotI              |
| gene expression <i>in trans</i> |                                                          |                   |
| advA-1-F                        | TGAATTGACTCTAGTCTGAGTGACAAC                              |                   |
| advA-1-R                        | CGCTGTTTATAGAATTTTGCCTATG                                |                   |
| advA-bamF                       | CAACTAGGAT <u>CC</u> GAAATCATAATCGAATTTCAATATAATTGCCTTGG | BamHI             |
| advA-xbatr1R                    | AATTT <u>CTAGAT</u> GTGCTGCACTACTCGGGCTGTC               | XbaI              |
| pbpG-F                          | AAATTAGAAT <u>TC</u> TATTCTTCTATAGTGAGCGAATAGTTG         | EcoRI             |
| pbpG-R                          | GTTGTCT <u>CTAGAT</u> GCAACAATGGACCAAGTAAAAGATTTCG       | XbaI              |
| pbp2-Feco                       | CATTATGAAT <u>TC</u> CATTTTCCCTAATCGTATGGTG              | EcoRI             |
| pbp2-Rpst                       | ATAATCTGCAGT <u>TG</u> ATTTTTTATTATTCATCGACCTC           | PstI              |
| elsL-F                          | GCAAGACAAGCTTTCCATAATTTTTTC                              |                   |
| elsL-R                          | GCACTTATTTTAATATTTTGATCATTTCGGCT                         |                   |
| Bacterial Two-Hybrid            |                                                          |                   |
| elsS-2H-sphF                    | GGGTAAGCATGCACAGCTTGCAACCAAAGCTTTCTTG                    | SphI              |
| elsS-2H-xbaR                    | GTCGCT <u>CTAGAG</u> ACCACTGACGTCGACGTTTGGTGTAAC         | XbaI              |

|                |                                                |         |
|----------------|------------------------------------------------|---------|
| mreD-2H-hindF  | AGGAGAAGCTTGATGCCGATCGCTAAGTTGAAACG            | HindIII |
| mreD-2H-xbaR   | GAAGCTCTAGAGAATTGCGCCATTTTGCTAAACAATAATAGAC    | XbaI    |
| rodA-2H-pstF   | AGTTACTGCAGCATGTCTCCTAGTCCACAATATAAAATTTTACGC  | PstI    |
| rodA-2H-xbaR   | AAATTICTAGAGATCGATGTGTATGAATAGACATGACTAAACCA   | XbaI    |
| pbp2-2H-xbaF   | TAAGTCTCTAGAGATGAAACAGCACTTTCCTTTAAAAGATATCCAG | XbaI    |
| pbp2-2H-ecoR   | ATTGATGAATTCCTTATTCATCGACCTCGTTTGTAGCAG        | EcoRI   |
| mreC-2H-xbaF   | GTTTAAATCTAGAGTCGGTGCAACCGAATATTTTTTCAAGACAGC  | XbaI    |
| mreC-2H-ecoR   | TCTCAGAATTCAACTTAGCGATCGGCATATGGTTGC           | EcoRI   |
| pbp1bB2H-F-xba | TAGATCTAGAAATGAAGTTTGAACGTGGTATCG              | XbaI    |
| pbp1bB2H-R-eco | CTTTGAATICTCTCTGTTTCTGTTAACGCT                 | EcoRI   |
| pbp1aB2H-F-xba | ICTAGACATGAAAAAGCTATCCAGTTTGGG                 | XbaI    |
| pbp1aB2H-R-eco | GAATTCGCGTAATAAAAAAGCCATCTAACGA                | EcoRI   |

### Mariner Tn-seq sequencing library construction

| primer name                                                            | Sequence (5' - 3')                                                    | index    |
|------------------------------------------------------------------------|-----------------------------------------------------------------------|----------|
| <i>First PCR</i>                                                       |                                                                       |          |
| Nextera 2A-R                                                           | GTCTCGTGGGCTCGGAGATGTGTATAAGAGACAG                                    |          |
| olj928                                                                 | CTGTGTGGGCACTCGACATATGAC                                              |          |
| olj638                                                                 | CTGTGTGGGCACTCGATGACGTCAGACC                                          |          |
| <i>Second PCR -- Leftward TN10 specific Nextera Indexed primers</i>    |                                                                       |          |
| 0lk147                                                                 | AATGATACGGCGACCACCGAGATCTACACGCGAGCGGCCGGGGGCCAAAATCATTAGGGGATTCATCAG | GCAGGCGG |
| 0lk148                                                                 | AATGATACGGCGACCACCGAGATCTACACAGGCAGAACCGGGGGCCAAAATCATTAGGGGATTCATCAG | AGGCAGAA |
| 0lk149                                                                 | AATGATACGGCGACCACCGAGATCTACACCAGAGAGGCCGGGGGCCAAAATCATTAGGGGATTCATCAG | CAGAGAGG |
| 0lk150                                                                 | AATGATACGGCGACCACCGAGATCTACACGAGGCTGCCGGGGGCCAAAATCATTAGGGGATTCATCAG  | CGAGGCTG |
| 0lk151                                                                 | AATGATACGGCGACCACCGAGATCTACACAAGAGGCACCGGGGGCCAAAATCATTAGGGGATTCATCAG | AAGAGGCA |
| 0lk152                                                                 | AATGATACGGCGACCACCGAGATCTACACGAGGAGCCCGGGGGCCAAAATCATTAGGGGATTCATCAG  | GAGGAGCC |
| 0lk153                                                                 | AATGATACGGCGACCACCGAGATCTACACAGCGCAGACCGGGGGCCAAAATCATTAGGGGATTCATCAG | AGCGCAGA |
| 0lk110                                                                 | AATGATACGGCGACCACCGAGATCTACACGTAAGGAGCCGGGGGCCAAAATCATTAGGGGATTCATCAG | GTAAGGAG |
| 0lk154                                                                 | AATGATACGGCGACCACCGAGATCTACACAACCCGACCGGGGGCCAAAATCATTAGGGGATTCATCAG  | AACCCGGA |
| 0lk155                                                                 | AATGATACGGCGACCACCGAGATCTACACGCGGAAGCCCGGGGGCCAAAATCATTAGGGGATTCATCAG | GCGGAAGC |
| <i>Second PCR -- Leftward Mariner specific Nextera Indexed primers</i> |                                                                       |          |
| mar147                                                                 | AATGATACGGCGACCACCGAGATCTACACGCGAGCGCGTTGACCGGGACTTATCAGCCAACCTGTTA   | GCAGGCGG |
| mar148                                                                 | AATGATACGGCGACCACCGAGATCTACACAGGCAGAACGTTGACCGGGACTTATCAGCCAACCTGTTA  | AGGCAGAA |
| mar149                                                                 | AATGATACGGCGACCACCGAGATCTACACCAGAGAGCGTTGACCGGGACTTATCAGCCAACCTGTTA   | CAGAGAGG |
| mar150                                                                 | AATGATACGGCGACCACCGAGATCTACACCAGGCTGCGTTGACCGGGACTTATCAGCCAACCTGTTA   | CGAGGCTG |
| mar151                                                                 | AATGATACGGCGACCACCGAGATCTACACAAGAGGCACGTTGACCGGGACTTATCAGCCAACCTGTTA  | AAGAGGCA |
| mar152                                                                 | AATGATACGGCGACCACCGAGATCTACACGAGGAGCCCGTTGACCGGGACTTATCAGCCAACCTGTTA  | GAGGAGCC |
| mar153                                                                 | AATGATACGGCGACCACCGAGATCTACACAGCGCAGACGTTGACCGGGACTTATCAGCCAACCTGTTA  | AGCGCAGA |
| mar110                                                                 | AATGATACGGCGACCACCGAGATCTACACGTAAGGAGCGTTGACCGGGACTTATCAGCCAACCTGTTA  | GTAAGGAG |
| mar154                                                                 | AATGATACGGCGACCACCGAGATCTACACAACCCGACGTTGACCGGGACTTATCAGCCAACCTGTTA   | AACCCGGA |
| mar155                                                                 | AATGATACGGCGACCACCGAGATCTACACGCGGAAGCCGTTGACCGGGACTTATCAGCCAACCTGTTA  | GCGGAAGC |
| <i>Second PCR -- Rightward Nextera Indexed primers</i>                 |                                                                       |          |
| olk141                                                                 | CAAGCAGAAGACGGCATAACGAGATCCGCTGCGTCTCGTGGGCTCGGAGATGTG                | GCAGGCGG |
| N703 index                                                             | CAAGCAGAAGACGGCATAACGAGATTTCTGCCTGTCTCGTGGGCTCGGAGATGTG               | AGGCAGAA |
| N708 index                                                             | CAAGCAGAAGACGGCATAACGAGATCCTCTCTGGTCTCGTGGGCTCGGAGATGTG               | CAGAGAGG |
| N710 index                                                             | CAAGCAGAAGACGGCATAACGAGATCAGCCTCGGTCTCGTGGGCTCGGAGATGTG               | CGAGGCTG |
| N711 index                                                             | CAAGCAGAAGACGGCATAACGAGATTGCCTCTTGTCTCGTGGGCTCGGAGATGTG               | AAGAGGCA |
| olk142                                                                 | CAAGCAGAAGACGGCATAACGAGATGGCTCCTCGTCTCGTGGGCTCGGAGATGTG               | GAGGAGCC |
| olk143                                                                 | CAAGCAGAAGACGGCATAACGAGATTCTGCCTGTCTCGTGGGCTCGGAGATGTG                | AGCGCAGA |
| olk144                                                                 | CAAGCAGAAGACGGCATAACGAGATCTCTTACGTCTCGTGGGCTCGGAGATGTG                | GTAAGGAG |
| olk145                                                                 | CAAGCAGAAGACGGCATAACGAGATTCGGGTTGTCTCGTGGGCTCGGAGATGTG                | AACCCGGA |

|                       |                                                         |          |
|-----------------------|---------------------------------------------------------|----------|
| olk146                | CAAGCAGAAGACGGCATAACGAGATGCTTCCGCGTCTCGTGGGCTCGGAGATGTG | GCGGAAGC |
| <i>Reconditioning</i> |                                                         |          |
| P1                    | AATGATACGGCGACCACCGA                                    |          |
| P2                    | CAAGCAGAAGACGGCATAACGA                                  |          |
| <i>Sequencing</i>     |                                                         |          |
| olk115                | CCGGGGGCCAAAATCATTAGGGGATTCATCAG                        |          |
| mar512                | CGTTGACCGGGGACTTATCAGCCAACCTGTTA                        |          |

## Supplementary References

- 1 Geisinger, E., Mortman, N. J., Vargas-Cuebas, G., Tai, A. K. & Isberg, R. R. A global regulatory system links virulence and antibiotic resistance to envelope homeostasis in *Acinetobacter baumannii*. *PLoS Pathog* **14**, e1007030, doi:10.1371/journal.ppat.1007030 (2018).
- 2 Geisinger, E. *et al.* The Landscape of Phenotypic and Transcriptional Responses to Ciprofloxacin in *Acinetobacter baumannii*: Acquired Resistance Alleles Modulate Drug-Induced SOS Response and Prophage Replication. *MBio* **10**, doi:10.1128/mBio.01127-19 (2019).
- 3 Bouvet, P. & Grimont, P. Taxonomy of the Genus *Acinetobacter* with the Recognition of *Acinetobacter baumannii* sp. nov. *Acinetobacter haemolyticus* sp. nov. *Acinetobacter johnsonii* sp. nov. and *Acinetobacter junii* sp. nov. and Emended Descriptions of *Acinetobacter calcoaceticus* and *Acinetobacter Iwofii*. *International Journal of Systematic Bacteriology* **36**, 228-240 (1986).
- 4 Gallagher, L. A. *et al.* Resources for Genetic and Genomic Analysis of Emerging Pathogen *Acinetobacter baumannii*. *J Bacteriol* **197**, 2027-2035, doi:10.1128/JB.00131-15 (2015).
- 5 Hanahan, D., Jessee, J. & Bloom, F. R. Plasmid transformation of *Escherichia coli* and other bacteria. *Methods Enzymol* **204**, 63-113, doi:0076-6879(91)04006-A [pii] (1991).
- 6 Kolter, R., Inuzuka, M. & Helinski, D. R. Trans-complementation-dependent replication of a low molecular weight origin fragment from plasmid R6K. *Cell* **15**, 1199-1208, doi:0092-8674(78)90046-6 [pii] (1978).
- 7 O'Connor, T. J., Adepoju, Y., Boyd, D. & Isberg, R. R. Minimization of the *Legionella pneumophila* genome reveals chromosomal regions involved in host range expansion. *Proc Natl Acad Sci U S A* **108**, 14733-14740 (2011).
- 8 Karimova, G., Gauliard, E., Davi, M., Ouellette, S. P. & Ladant, D. Protein-Protein Interaction: Bacterial Two-Hybrid. *Methods Mol Biol* **1615**, 159-176, doi:10.1007/978-1-4939-7033-9\_13 (2017).
- 9 Yanisch-Perron, C., Vieira, J. & Messing, J. Improved M13 phage cloning vectors and host strains: nucleotide sequences of the M13mp18 and pUC19 vectors. *Gene* **33**, 103-119 (1985).
- 10 Andrews, H. L., Vogel, J. P. & Isberg, R. R. Identification of linked *Legionella pneumophila* genes essential for intracellular growth and evasion of the endocytic pathway. *Infect Immun* **66**, 950-958 (1998).
- 11 Meyer, R., Hinds, M. & Brasch, M. Properties of R1162, a broad-host-range, high-copy-number plasmid. *J Bacteriol* **150**, 552-562 (1982).
- 12 Hunger, M., Schmucker, R., Kishan, V. & Hillen, W. Analysis and nucleotide sequence of an origin of DNA replication in *Acinetobacter calcoaceticus* and its use for *Escherichia coli* shuttle plasmids. *Gene* **87**, 45-51 (1990).
